# Supplementary material for: Supramolecular Solvent-Based Microextraction of Selected Anticonvulsant and Nonsteroidal Anti-Inflammatory Drugs from Sediment Samples
Source: MDPI journal article supplement (doi:10.3390/molecules25235671), 2020-12-01
Supplement: s1 [file s1]

# Supramolecular solvent-based microextraction of selected anticonvulsant and nonsteroidal anti-inflammatory drugs from sediment samples

Sylwia Bajkacz<sup>1,\*</sup>, Paulina Adamczewska<sup>1</sup>, Klaudia Kokoszka<sup>1</sup>,  
Elżbieta Kycia-Słocka<sup>1</sup>, Adam Sochacki<sup>2,3</sup>, Ewa Felis<sup>2</sup>

<sup>1</sup> *Silesian University of Technology, Faculty of Chemistry, Department of Inorganic Chemistry, Analytical Chemistry and Electrochemistry, B. Krzywoustego 6 St., 44-100 Gliwice, Poland*

<sup>2</sup> *Silesian University of Technology, Faculty of Power and Environmental Engineering, Environmental Biotechnology Department, Akademicka 2 St., 44-100 Gliwice, Poland*

<sup>3</sup> *Czech University of Life Sciences Prague, Faculty of Environmental Sciences, Department of Applied Ecology, Kamýcká 129, 165 00 Prague, Czech Republic*

## SUPPLEMENTARY INFORMATION

### Summary

This supporting information file includes additional results and information as described in the text of the main article including:

- Table S1.** Properties of selected drugs.
- Table S2.** Accuracy and precision of the developed methods.
- Figure S1.** Effect of the amount of DeA on the recovery of analytes.
- Figure S2.** Influence of supramolecular solvent volume on recovery and enriching analytes.
- Figure S3.** The effect of sample mass on recovery and enrichment of analytes.
- Figure S4.** Influence of extraction time on recovery of analytes.
- Figure S5a.** Influence of centrifugation time on recovery of analytes.
- Figure S5b.** The effect of centrifugation rotation on the recovery of analytes.
- Figure S6.** Freundlich adsorption isotherm for ibuprofen.
- Figure S7.** Determination of the  $K_D$  parameter for ibuprofen.

---

\* Corresponding author.  
E-mail address: sylwia.bajkacz@polsl.pl (S. Bajkacz).

**Table S1.** Properties of selected drugs.

| <i>Compound</i> | <i>Structural formula</i>                                                          | <i>logP</i> | <i>pK<sub>a</sub></i> |
|-----------------|------------------------------------------------------------------------------------|-------------|-----------------------|
| <b>CBZ</b>      | 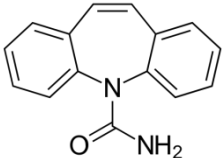  | 2.77        | 13.9                  |
| <b>ACE</b>      |   | 3.42        | 5.1                   |
| <b>DIC</b>      |   | 4.26        | 4.1                   |
| <b>IBU</b>      |  | 3.94        | 4.9                   |

**Table S2.** Accuracy and precision of the developed methods.

| <i>Compound</i>                | <i>Theoretical concentration<br/>(<math>\mu\text{g g}^{-1}</math>) / (<math>\mu\text{g L}^{-1}</math>)</i> | <i>Measure concentration<br/>(<math>\mu\text{g g}^{-1}</math>) / (<math>\mu\text{g L}^{-1}</math>)</i> | <i>SD<sup>a</sup><br/>(<math>\mu\text{g g}^{-1}</math>) / (<math>\mu\text{g L}^{-1}</math>)</i> | <i>RE<sup>b</sup><br/>(%)</i> | <i>CV<sup>c</sup><br/>(%)</i> |
|--------------------------------|------------------------------------------------------------------------------------------------------------|--------------------------------------------------------------------------------------------------------|-------------------------------------------------------------------------------------------------|-------------------------------|-------------------------------|
| <i>Bottom sediment samples</i> |                                                                                                            |                                                                                                        |                                                                                                 |                               |                               |
| <b>CBZ</b>                     | 1.25                                                                                                       | 1.41                                                                                                   | 0.062                                                                                           | 13                            | 10                            |
|                                | 10                                                                                                         | 11.1                                                                                                   | 0.44                                                                                            | 11                            | 9.1                           |
|                                | 20                                                                                                         | 20.9                                                                                                   | 1.32                                                                                            | 4.9                           | 12                            |
| <b>DIC</b>                     | 1.25                                                                                                       | 1.32                                                                                                   | 0.061                                                                                           | 5.5                           | 11                            |
|                                | 10                                                                                                         | 10.8                                                                                                   | 0.54                                                                                            | 7.8                           | 11                            |
|                                | 20                                                                                                         | 19.8                                                                                                   | 1.13                                                                                            | -0.8                          | 11                            |
| <b>IBU</b>                     | 1.25                                                                                                       | 1.23                                                                                                   | 0.032                                                                                           | -1.5                          | 5.8                           |
|                                | 10                                                                                                         | 10.8                                                                                                   | 0.24                                                                                            | 8.2                           | 5.4                           |
|                                | 20                                                                                                         | 19.3                                                                                                   | 1.14                                                                                            | -3.5                          | 11                            |
| <i>Water samples</i>           |                                                                                                            |                                                                                                        |                                                                                                 |                               |                               |
| <b>CBZ</b>                     | 0.5                                                                                                        | 0.48                                                                                                   | 0.042                                                                                           | -4.9                          | 9.2                           |
|                                | 2                                                                                                          | 2.1                                                                                                    | 0.13                                                                                            | 4.9                           | 3.4                           |
|                                | 4                                                                                                          | 4.1                                                                                                    | 0.34                                                                                            | 1.4                           | 6.9                           |
| <b>DIC</b>                     | 0.5                                                                                                        | 0.45                                                                                                   | 0.034                                                                                           | -10                           | 7.7                           |
|                                | 2                                                                                                          | 2.1                                                                                                    | 0.003                                                                                           | 3.8                           | 0.9                           |
|                                | 4                                                                                                          | 4.1                                                                                                    | 0.35                                                                                            | 7.5                           | 6.4                           |
| <b>IBU</b>                     | 0.5                                                                                                        | 0.47                                                                                                   | 0.044                                                                                           | -6.0                          | 8.9                           |
|                                | 2                                                                                                          | 2.2                                                                                                    | 0.004                                                                                           | 11                            | 0.6                           |
|                                | 4                                                                                                          | 4.1                                                                                                    | 0.32                                                                                            | 2.1                           | 7.1                           |

<sup>a</sup> SD – standard deviation<sup>b</sup> RE – relative error<sup>c</sup> CV – coefficient of variation

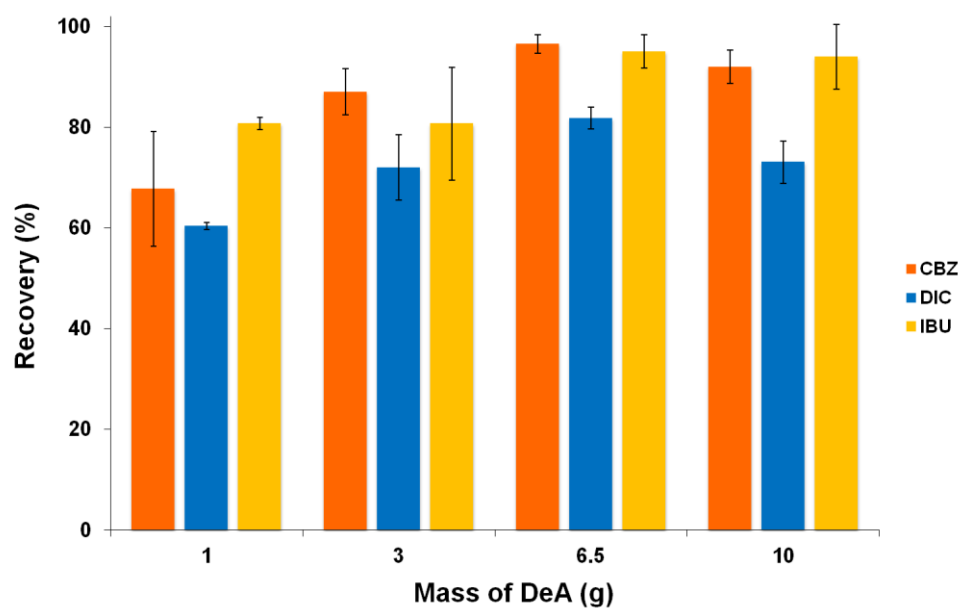

**Figure S1.** Effect of the amount of DeA on the recovery of analytes.

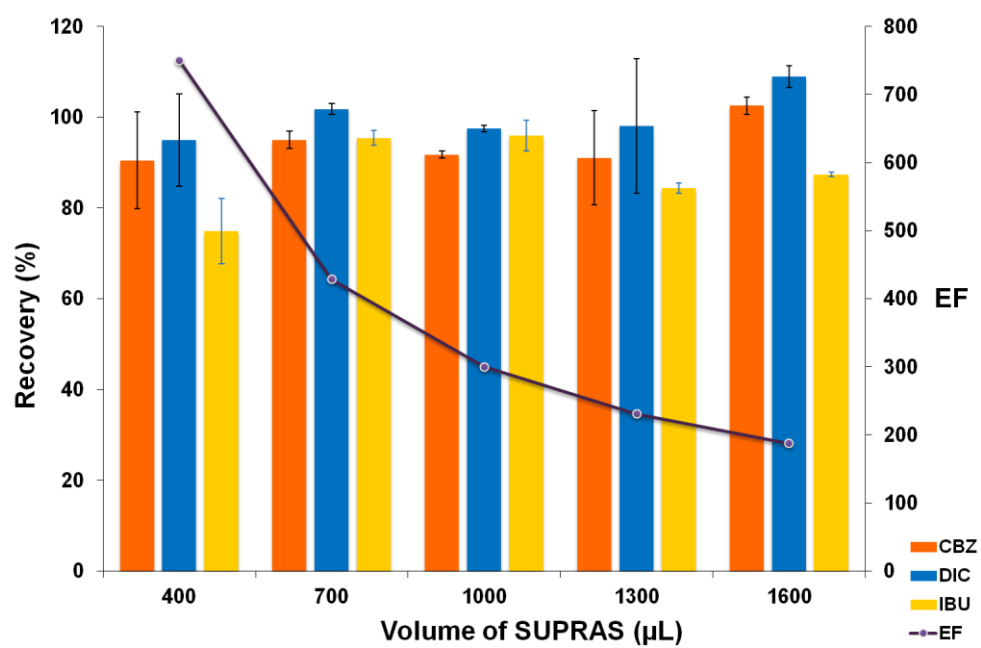

**Figure S2.** Influence of supramolecular solvent volume on recovery and enriching analytes.

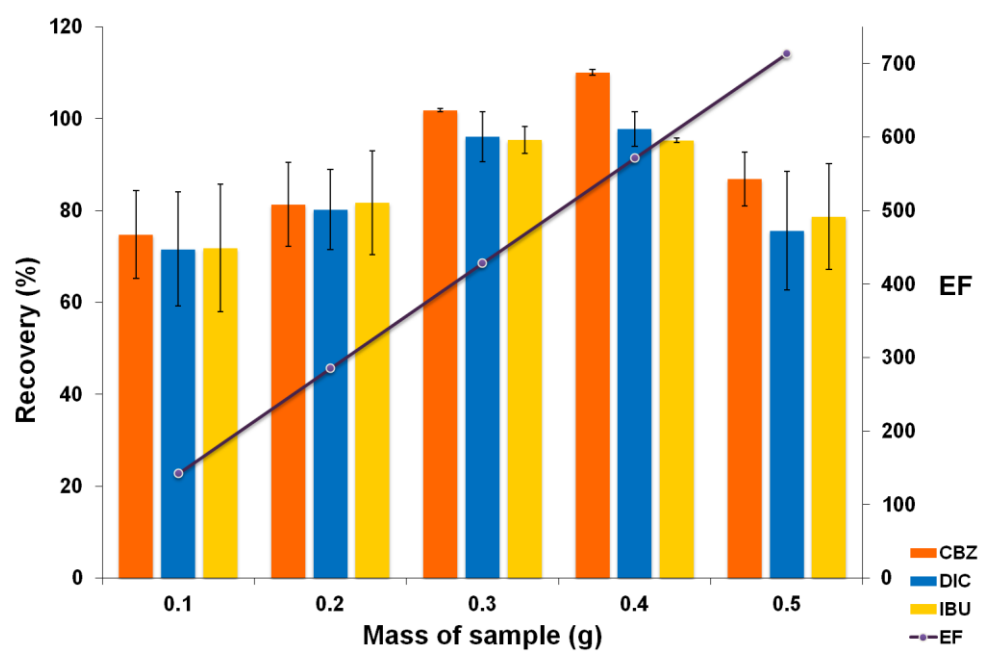

**Figure S3.** The effect of sample mass on recovery and enrichment of analytes.

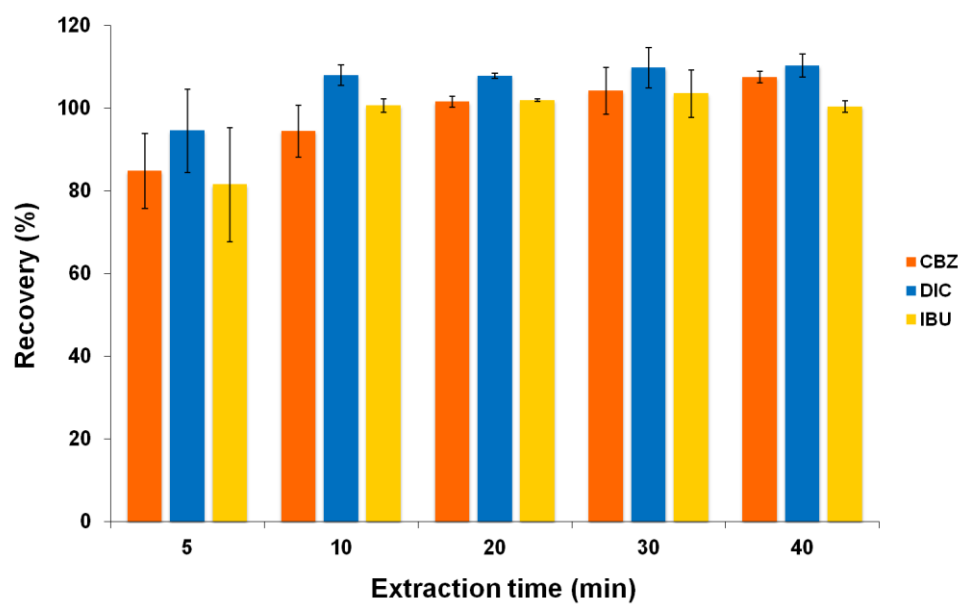

**Figure S4.** Influence of extraction time on recovery of analytes.

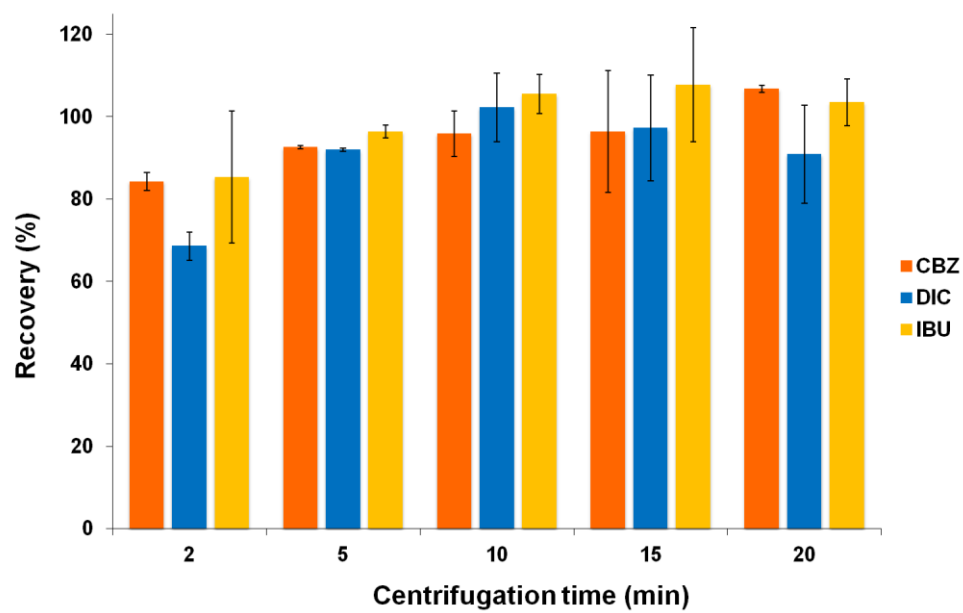

**Figure S5a.** Influence of centrifugation time on recovery of analytes.



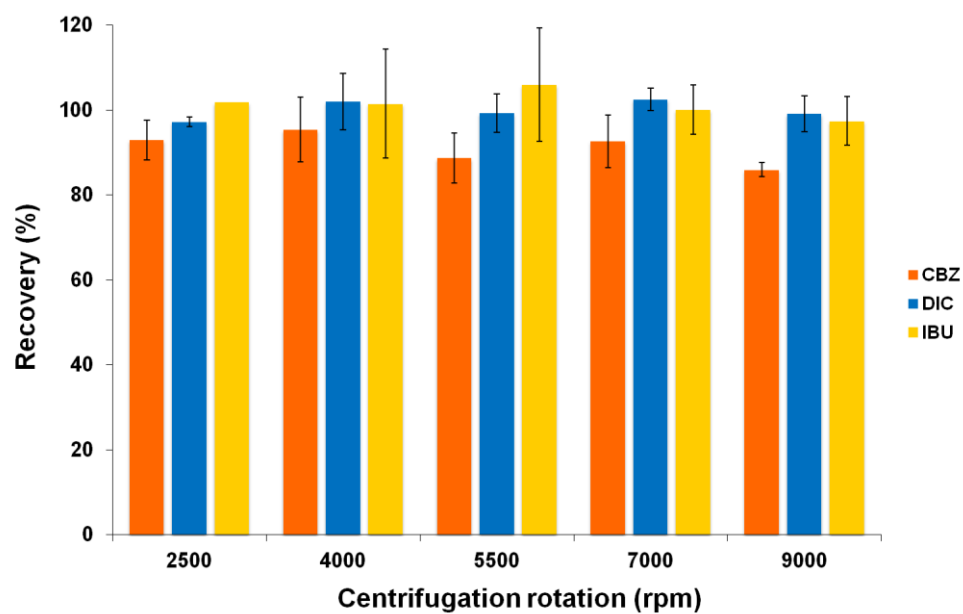

**Figure S5b.** The effect of centrifugation rotation on the recovery of analytes.

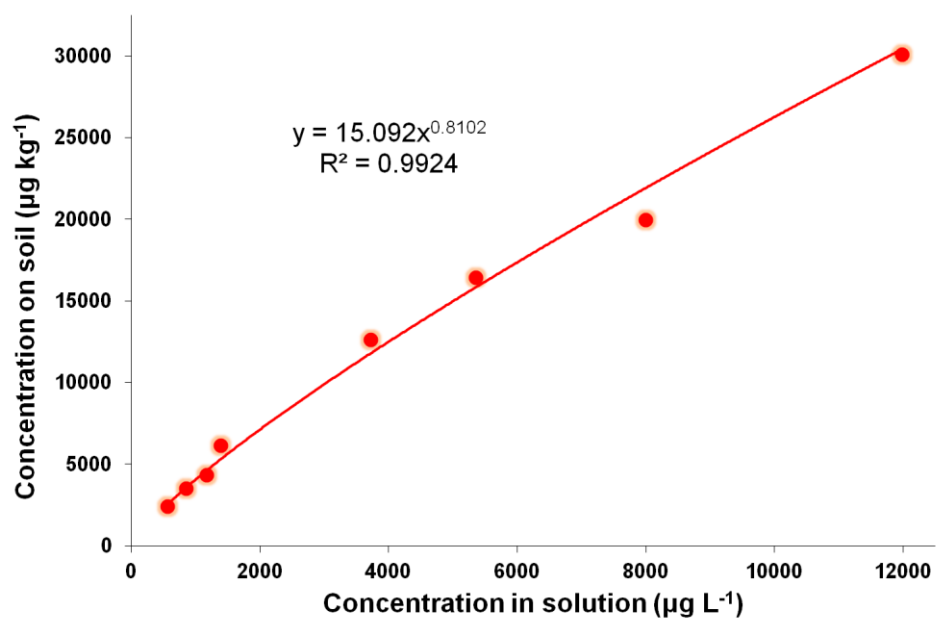

**Figure S6.** Freundlich adsorption isotherm for ibuprofen.

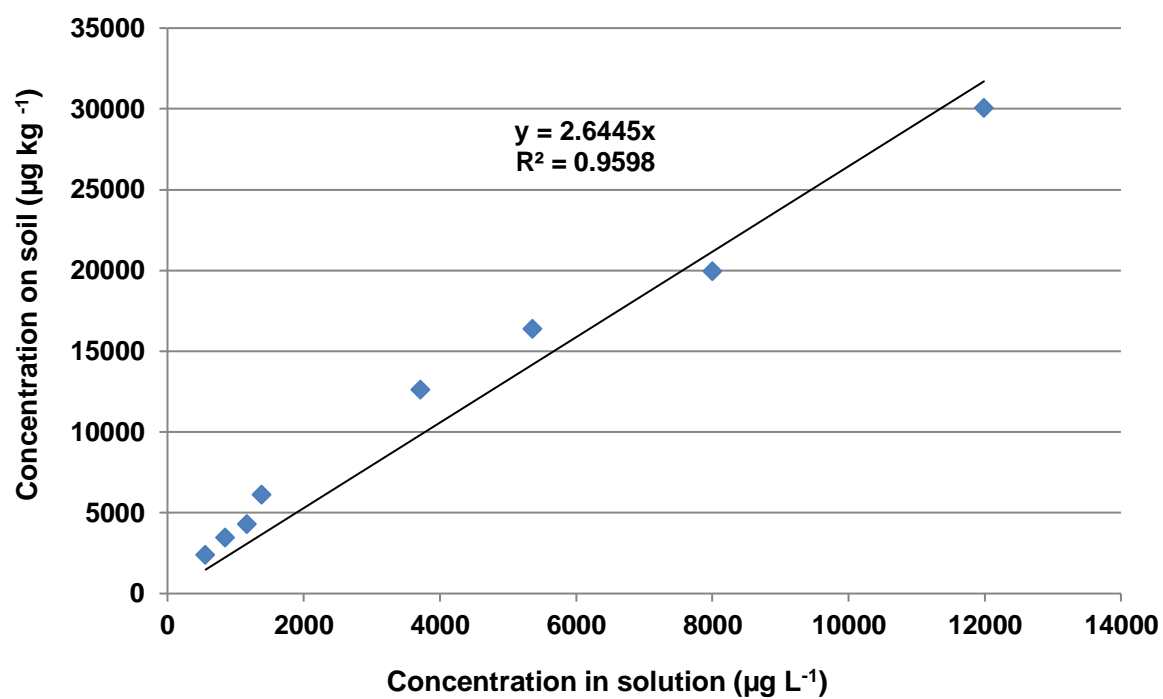

**Figure S7.** Determination of the  $K_D$  parameter for ibuprofen.
